# Supplementary material for: Plant pathogen‐mediated rapid acclimation of a host‐specialized aphid to a non‐host plant
Source: PubMed Central journal article supplement (PMC8571567; doi:10.1002/ece3.8209), 2021-10-11

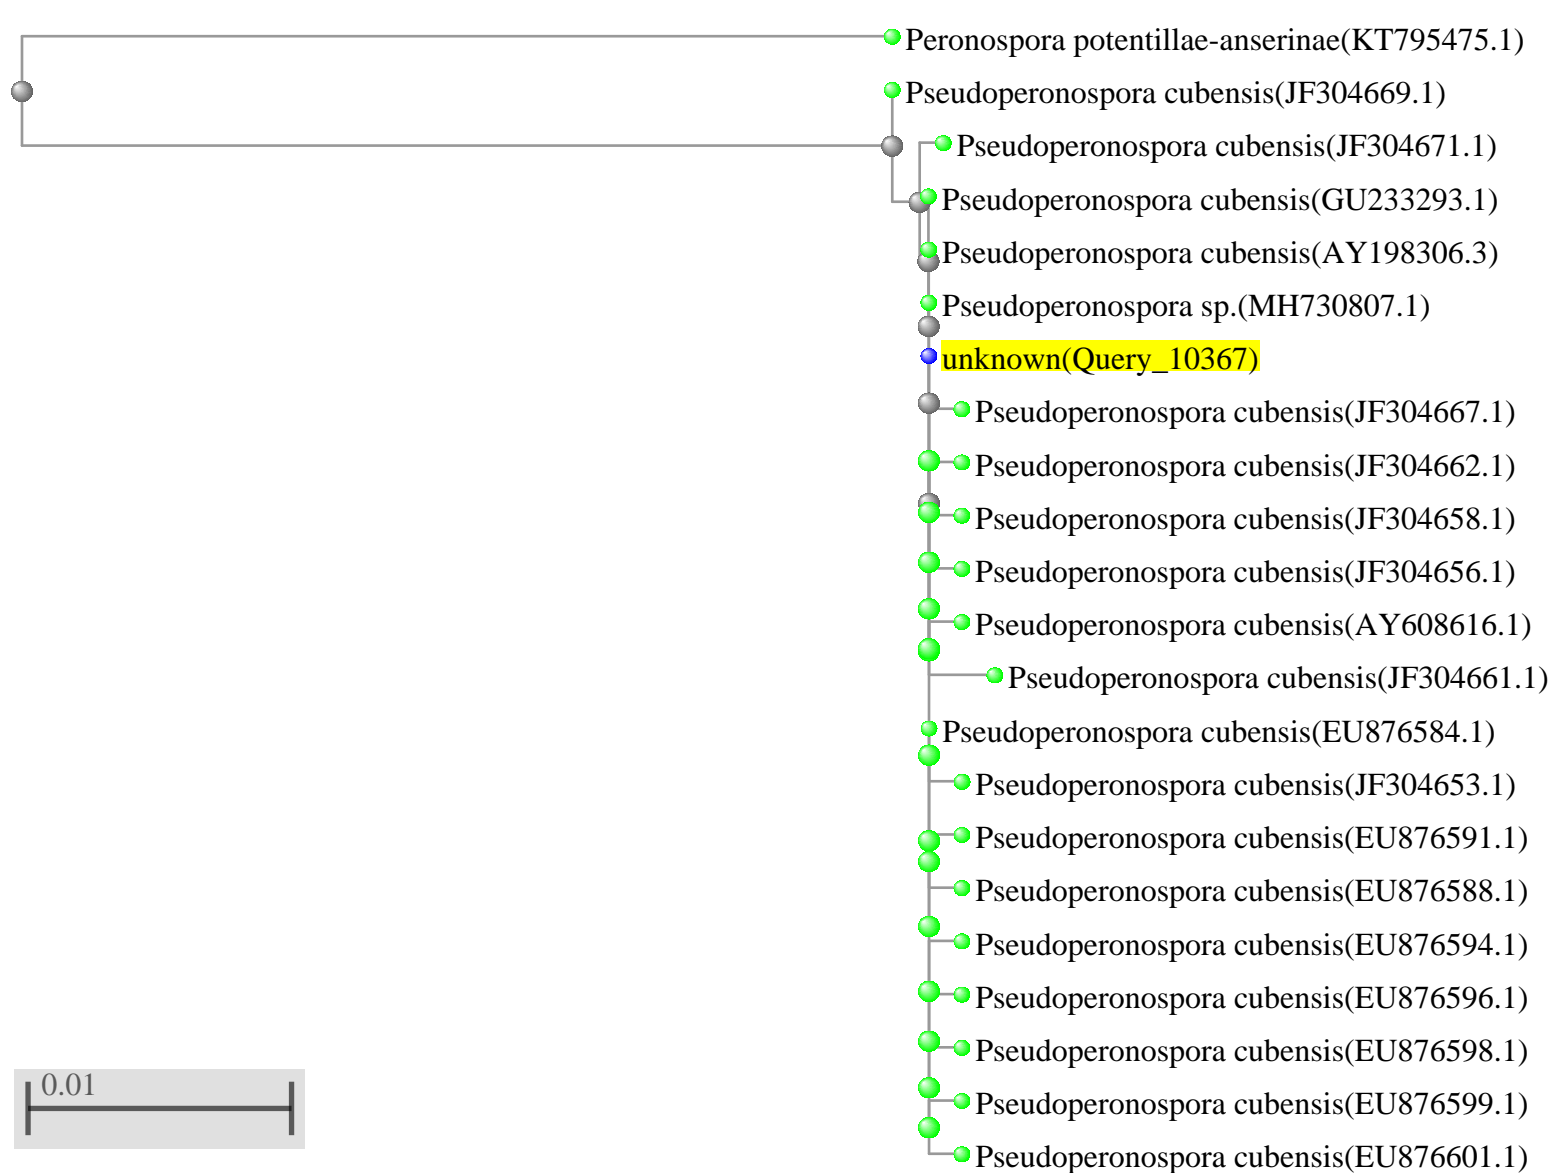

Supplement: ECE3-11-15261-s001.pdf [file ECE3-11-15261-s001.pdf]
